# Supplementary material for: Studies on the interaction of 2-amino-3-hydroxy-anthraquinone with surfactant micelles reveal its nucleation in human MDA-MB-231 breast adinocarcinoma cells
Source: Royal Society of Chemistry journal article supplement (doi:10.1039/c6ra00062b), 2016-01-01
Supplement: c6ra00062b1.pdf [file c6ra00062b1.pdf]

### Supplementary Information

## **Studies on the interaction of 2-amino-3-hydroxy-anthraquinone with surfactant micelles reveal its nucleation in human MDA-MB-231 breast adenocarcinoma cells**

Amit Das, Sanjay Roy, Palash Mondal, Arup Dutta, Kalachand Mahali, Gayathri Loganathan,  
Dhanasekaran Dharumadurai, Partha Sarathi Sengupta, Mohammad A. Akbarsha, Partha Sarathi Guin\*

**Table S1:** Some important bond lengths, bond angles of AQ

**(a) Bond length (Å)**

| Types of bond | Bond length<br>(Å) | Types of bond | Bond length<br>(Å) | Types of bond | Bond length<br>(Å) |
|---------------|--------------------|---------------|--------------------|---------------|--------------------|
| N23-H24       | 1.015              | O26-H27       | 0.970              | C2-H17        | 1.084              |
| N23-H25       | 1.013              | C11-H12       | 1.084              | C1-H16        | 1.085              |
| N23-C14       | 1.394              | C15-H20       | 1.085              | C6-H19        | 1.085              |
| C14-C13       | 1.419              | C8-O21        | 1.234              | C5-H18        | 1.084              |
| O26-C13       | 1.365              | C7-O22        | 1.235              | C1-C6         | 1.399              |

**(b) Bond angle (degree)**

| Types of Bond | BA (°) | Types of Bond | BA (°) | Types of Bond | BA (°) |
|---------------|--------|---------------|--------|---------------|--------|
| H25-N23-H24   | 110.22 | H27-O26-C13   | 110.01 | C3-C7-O22     | 120.79 |
| H25-N23-C14   | 114.46 | C13-C11-H12   | 119.49 | C4-C8-O21     | 120.85 |
| H24-N23-C14   | 115.58 | C14-C15-H20   | 119.79 | C4-C5-H18     | 118.83 |
| N23-C14-C13   | 113.08 | C9-C8-O21     | 121.43 | C6-C1-H16     | 120.08 |
| C14-C13-O26   | 120.68 | C10-C7-O22    | 121.52 | C1-C2-H17     | 120.81 |

**Table S2.** TDDFT results for low lying excited state of AQ.

| Excited state | $\Delta E$ (eV) | Oscillator strength (f) | Contribution                                                                                                                | Coefficient                               | Eigen values |
|---------------|-----------------|-------------------------|-----------------------------------------------------------------------------------------------------------------------------|-------------------------------------------|--------------|
| 1             | 2.846           | 0.0263                  | (HOMO-4) $\rightarrow$ LUMO<br>(HOMO -2) $\rightarrow$ LUMO<br>HOMO $\rightarrow$ LUMO                                      | 0.1089<br>-0.10805<br>0.68707             | 0.9970       |
| 2             | 3.075           | 0.0012                  | (HOMO -5) $\rightarrow$ (LUMO+1)<br>(HOMO -2) $\rightarrow$ LUMO<br>(HOMO -1) $\rightarrow$ LUMO<br>HOMO $\rightarrow$ LUMO | -0.10653<br>0.67464<br>0.12443<br>0.11057 | 0.9705       |
| 3             | 3.336           | 0.002                   | (HOMO -5) $\rightarrow$ LUMO<br>(HOMO -4) $\rightarrow$ LUMO<br>(HOMO -2) $\rightarrow$ LUMO                                | 0.67145<br>0.11391<br>-0.15454            | 0.9403       |

**Table S3.** Comparison of theoretical and experimental IR stretching frequency of AQ.

| $\nu_{\text{cal}} (\text{cm}^{-1})$ | $\nu_{\text{scaled}} (\text{cm}^{-1})$ | Intensity | PED (%)                                      | Interpretation                                                                                                                                                                                                                                                                         | $\nu_{\text{expt}} (\text{cm}^{-1})$ |
|-------------------------------------|----------------------------------------|-----------|----------------------------------------------|----------------------------------------------------------------------------------------------------------------------------------------------------------------------------------------------------------------------------------------------------------------------------------------|--------------------------------------|
| 3758                                | 3612                                   | 174       | S <sub>1</sub> (100)                         | $\nu_{\text{sym}} (\text{O}_{236}\text{-H}_{27})$                                                                                                                                                                                                                                      | 3730                                 |
| 3643                                | 3502                                   | 50        | S <sub>2</sub> (96)                          | $\nu_{\text{sym}} (\text{N}_{23}\text{-H}_{24}), \nu_{\text{sym}} (\text{N}_{23}\text{-H}_{25})$                                                                                                                                                                                       | 3486                                 |
| 3541                                | 3403                                   | 86        | S <sub>3</sub> (96)                          | $\nu_{\text{sym}} (\text{N}_{23}\text{-H}_{24}), \nu_{\text{sym}} (\text{N}_{23}\text{-H}_{25})$                                                                                                                                                                                       | 3356                                 |
| 3225                                | 3100                                   | 22        | S <sub>7</sub> (81)                          | $\nu_{\text{asym}} (\text{C}_1\text{-H}_{16})$                                                                                                                                                                                                                                         | 3073                                 |
| 3210                                | 3085                                   | 17        | S <sub>9</sub> (94)                          | $\nu_{\text{sym}} (\text{C}_{15}\text{-H}_{20})$                                                                                                                                                                                                                                       | 2804                                 |
| 1701                                | 1635                                   | 480       | S <sub>10</sub> (-64)                        | $\nu_{\text{asym}} (\text{O}_{21}\text{-C}_8)$                                                                                                                                                                                                                                         | 1656                                 |
| 1688                                | 1622                                   | 26        | S <sub>11</sub> (72)                         | $\nu_{\text{asym}} (\text{O}_{22}\text{-C}_7)$                                                                                                                                                                                                                                         | 1613                                 |
| 1665                                | 1600                                   | 32        | S <sub>32</sub> (72), S <sub>33</sub> (10)   | $\beta (\text{H}_{25}\text{-N}_{23}\text{-H}_{24}), \tau (\text{H}_{24}\text{-N}_{23}\text{-C}_{14}\text{-C}_{13}),$                                                                                                                                                                   | 1588                                 |
| 1621                                | 1558                                   | 306       | S <sub>20</sub> (-34), S <sub>27</sub> (14)  | $\nu_{\text{sym}} (\text{C}_1\text{-C}_2), \beta (\text{C}_{13}\text{-C}_{11}\text{-C}_{10})$                                                                                                                                                                                          | 1543                                 |
| 1613                                | 1550                                   | 336       | S <sub>17</sub> (43), S <sub>48</sub> (-14)  | $\nu_{\text{sym}} (\text{C}_1\text{-C}_6), \nu_{\text{sym}} (\text{C}_5\text{-C}_6), \beta (\text{C}_{15}\text{-C}_{14}\text{-N}_{23})$                                                                                                                                                | -                                    |
| 1599                                | 1537                                   | 392       | S <sub>20</sub> (41), S <sub>41</sub> (-12)  | $\nu_{\text{sym}} (\text{C}_1\text{-C}_6), \nu_{\text{sym}} (\text{C}_1\text{-C}_2), \beta (\text{C}_1\text{-C}_2\text{-C}_3),$<br>$\beta (\text{C}_4\text{-C}_5\text{-C}_6), \beta (\text{C}_{10}\text{-C}_{11}\text{-C}_{13}), \beta (\text{C}_9\text{-C}_{15}$<br>$\text{-C}_{14})$ | -                                    |
| 1541                                | 1481                                   | 135       | S <sub>22</sub> (-14), S <sub>35</sub> (-14) | $\nu_{\text{sym}} (\text{N}_{23}\text{-C}_{14}), \beta (\text{H}_{17}\text{-C}_2\text{-C}_1)$                                                                                                                                                                                          | 1466                                 |
| 1488                                | 1430                                   | 4         | S <sub>18</sub> (-25)                        | $\nu_{\text{sym}} (\text{C}_4\text{-C}_5)$                                                                                                                                                                                                                                             | 1448                                 |
| 1472                                | 1415                                   | 61        | S <sub>15</sub> (27)                         | $\nu_{\text{sym}} (\text{C}_{10}\text{-C}_{11})$                                                                                                                                                                                                                                       | 1362                                 |
| 1415                                | 1360                                   | 11        | S <sub>12</sub> (53)                         | $\nu_{\text{sym}} (\text{C}_9\text{-C}_{10})$                                                                                                                                                                                                                                          | 1287                                 |

|      |      |      |                                                                  |                                                                                                                                                                                                                                                               |      |
|------|------|------|------------------------------------------------------------------|---------------------------------------------------------------------------------------------------------------------------------------------------------------------------------------------------------------------------------------------------------------|------|
| 1371 | 1317 | 120  | S <sub>13</sub> (70)                                             | $\nu_{\text{sym}}(\text{C}_4\text{-C}_5), \nu_{\text{sym}}(\text{C}_1\text{-C}_2), \nu_{\text{sym}}(\text{C}_3\text{-C}_4), \nu_{\text{sym}}(\text{C}_5\text{-C}_6)$                                                                                          | 1269 |
| 1352 | 1299 | 1344 | S <sub>21</sub> (-59)                                            | $\nu_{\text{sym}}(\text{C}_8\text{-C}_9), \nu_{\text{sym}}(\text{C}_9\text{-C}_{15}), \nu_{\text{sym}}(\text{N}_{23}\text{-C}_{14})$                                                                                                                          | -    |
| 1314 | 1263 | 365  | S <sub>25</sub> (16)                                             | $\nu_{\text{sym}}(\text{C}_7\text{-C}_{10}), \nu_{\text{sym}}(\text{C}_9\text{-C}_8)$                                                                                                                                                                         | -    |
| 1289 | 1239 | 709  | S <sub>24</sub> (-24)                                            | $\nu_{\text{sym}}(\text{N}_{23}\text{-C}_{14}), \nu_{\text{sym}}(\text{C}_4\text{-C}_8)$                                                                                                                                                                      | -    |
| 1283 | 1233 | 69   | S <sub>23</sub> (13), S <sub>24</sub> (-14)                      | $\nu_{\text{sym}}(\text{O}_{26}\text{-C}_{13}), \nu_{\text{sym}}(\text{N}_{23}\text{-C}_{14}), \nu_{\text{sym}}(\text{C}_4\text{-C}_8),$                                                                                                                      | 1197 |
| 1236 | 1188 | 93   | S <sub>23</sub> (13)                                             | $\nu_{\text{sym}}(\text{O}_{26}\text{-C}_{13})$                                                                                                                                                                                                               | -    |
| 1193 | 1146 | 100  | S <sub>30</sub> (11)                                             | $\beta(\text{H}_{27}\text{-O}_{26}\text{-C}_{13})$                                                                                                                                                                                                            | 1115 |
| 1130 | 1086 | 97   | S <sub>34</sub> (15)                                             | $\beta(\text{H}_{16}\text{-C}_1\text{-C}_2), \beta(\text{H}_{19}\text{-C}_6\text{-C}_1)$                                                                                                                                                                      | 1085 |
| 1104 | 1061 | 36   | S <sub>37</sub> (-11)                                            | $\beta(\text{H}_{20}\text{-C}_{15}\text{-C}_{14}), \beta(\text{H}_{12}\text{-C}_{11}\text{-C}_{13})$                                                                                                                                                          | 968  |
| 979  | 941  | 80   | S <sub>19</sub> (25)                                             | $\nu_{\text{sym}}(\text{C}_1\text{-C}_6), \nu_{\text{sym}}(\text{C}_5\text{-C}_6)$                                                                                                                                                                            | 891  |
| 925  | 889  | 56   | S <sub>59</sub> (82)                                             | $\tau(\text{H}_{12}\text{-C}_{11}\text{-C}_{13}\text{-C}_{14}), \tau(\text{H}_{20}\text{-C}_{15}\text{-C}_{14}\text{-N}_{23})$                                                                                                                                | 879  |
| 797  | 766  | 96   | S <sub>22</sub> (-18), S <sub>23</sub> (-10)                     | $\nu_{\text{sym}}(\text{N}_{23}\text{-C}_{14}), \nu_{\text{sym}}(\text{C}_9\text{-C}_{15}), \nu_{\text{sym}}(\text{O}_{26}\text{-C}_{13})$                                                                                                                    | 812  |
| 750  | 720  | 46   | S <sub>43</sub> (10), S <sub>44</sub> (24)                       | $\beta(\text{C}_1\text{-C}_6\text{-C}_5), \beta(\text{C}_{13}\text{-C}_{11}\text{-C}_{10})$                                                                                                                                                                   | 793  |
| 731  | 702  | 175  | S <sub>55</sub> (-39), S <sub>70</sub> (-41)                     | $\tau(\text{H}_{16}\text{-C}_1\text{-C}_6\text{-C}_5), \tau(\text{H}_{19}\text{-C}_6\text{-C}_1\text{-C}_2), \tau(\text{O}_{21}\text{-C}_4\text{-C}_9\text{-C}_8), \tau(\text{O}_{22}\text{-C}_3\text{-C}_{10}\text{-C}_7)$                                   | 740  |
| 723  | 695  | 108  | S <sub>53</sub> (-10), S <sub>72</sub> (54)                      | $\tau(\text{H}_{24}\text{-N}_{23}\text{-C}_{14}\text{-C}_{13}), \tau(\text{H}_{25}\text{-N}_{23}\text{-C}_{14}\text{-C}_{13}), \tau(\text{N}_{23}\text{-C}_{13}\text{-C}_{15}\text{-C}_{14}), \tau(\text{O}_{26}\text{-C}_{11}\text{-C}_{14}\text{-C}_{13}),$ | 714  |
| 678  | 651  | 77   | S <sub>29</sub> (10), S <sub>43</sub> (12), S <sub>45</sub> (30) | $\beta(\text{C}_{15}\text{-C}_{14}\text{-N}_{23}), \beta(\text{C}_{10}\text{-C}_9\text{-C}_{15}), \beta(\text{C}_{11}\text{-C}_{13}\text{-O}_{26}), \beta(\text{C}_1\text{-C}_6\text{-C}_5), \beta(\text{C}_9\text{-C}_8\text{-O}_{21}), \beta$               | 676  |

|     |     |     |                                              |                                                                                                                                                                                                                                                                                                     |     |
|-----|-----|-----|----------------------------------------------|-----------------------------------------------------------------------------------------------------------------------------------------------------------------------------------------------------------------------------------------------------------------------------------------------------|-----|
|     |     |     |                                              | (H <sub>9</sub> -C <sub>15</sub> -C <sub>14</sub> ),                                                                                                                                                                                                                                                |     |
| 673 | 646 | 360 | S <sub>53</sub> (-42), S <sub>72</sub> (-13) | τ (H <sub>24</sub> -N <sub>23</sub> -C <sub>14</sub> -C <sub>13</sub> ), τ (H <sub>25</sub> -N <sub>23</sub> -C <sub>14</sub> -C <sub>13</sub> ), τ (N <sub>23</sub> -C <sub>13</sub> -C <sub>15</sub> -C <sub>14</sub> ), τ (O <sub>26</sub> -C <sub>11</sub> -C <sub>14</sub> -C <sub>13</sub> ), | 615 |
| 624 | 599 | 95  | S <sub>41</sub> (62)                         | β (C <sub>1</sub> -C <sub>2</sub> -C <sub>3</sub> ), β (C <sub>4</sub> -C <sub>5</sub> -C <sub>6</sub> ), β (C <sub>10</sub> -C <sub>11</sub> -C <sub>13</sub> ), β (C <sub>9</sub> -C <sub>15</sub> -C <sub>14</sub> )                                                                             | -   |
| 606 | 582 | 50  | S <sub>45</sub> (-21), S <sub>48</sub> (12)  | β (C <sub>9</sub> -C <sub>8</sub> -O <sub>21</sub> ), β (C <sub>10</sub> -C <sub>7</sub> -O <sub>22</sub> )                                                                                                                                                                                         | -   |
| 512 | 492 | 155 | S <sub>30</sub> (11)                         | β (H <sub>27</sub> -O <sub>26</sub> -C <sub>13</sub> ),                                                                                                                                                                                                                                             | -   |
